# Supplementary material for: Microdroplet fabrication of silver–agarose nanocomposite beads for SERS optical accumulation
Source: Royal Society of Chemistry journal article supplement (doi:10.1039/c0sm00601g), 2010-10-26
Supplement: c0sm00601g.pdf [file c0sm00601g.pdf]

Supporting information for:

**Microdroplet fabrication of silver-agarose  
nanocomposite beads for SERS optical  
accumulation**

Sara Abalde-Cela<sup>a</sup>, Baptiste Auguie<sup>a</sup>, Martin Fischlechner<sup>b</sup>, Wilhelm T. S. Huck<sup>b</sup>,

Ramón A. Alvarez-Puebla<sup>a\*</sup>, Luis M. Liz-Marzán<sup>a\*</sup>, Chris Abell<sup>b\*</sup>

<sup>a</sup> Departamento de Química Física and Unidad Asociada CSIC-Universidade de Vigo,

36310 Vigo, Spain

<sup>b</sup> Department of Chemistry, Lensfield Road, Cambridge CB2 1EW, United Kingdom

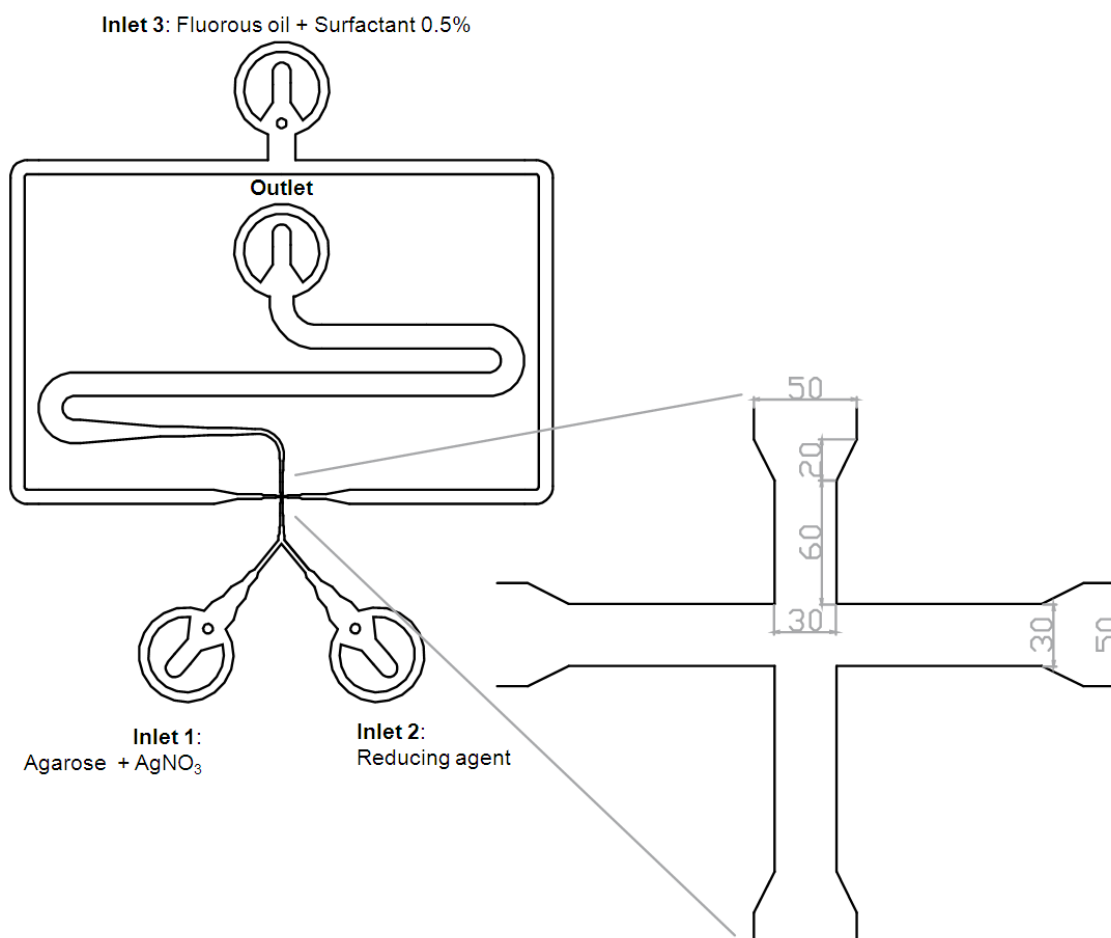

**Figure S1.** Scheme of three inlet microdroplet device.

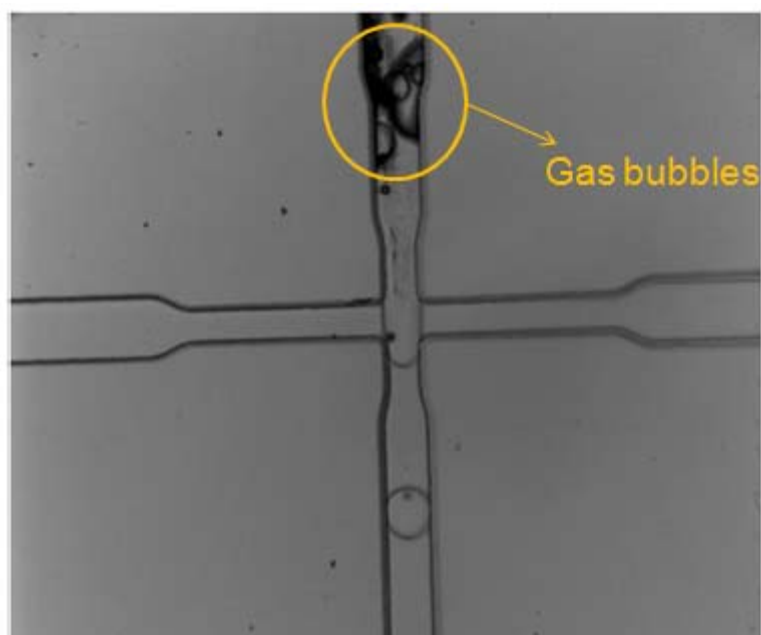

**Figure S2.** T-junction showing the formation of bubbles when using sodium borohydride or ascorbic acid as reducing agents in an on-chip fabrication of Ag-agarose beads.

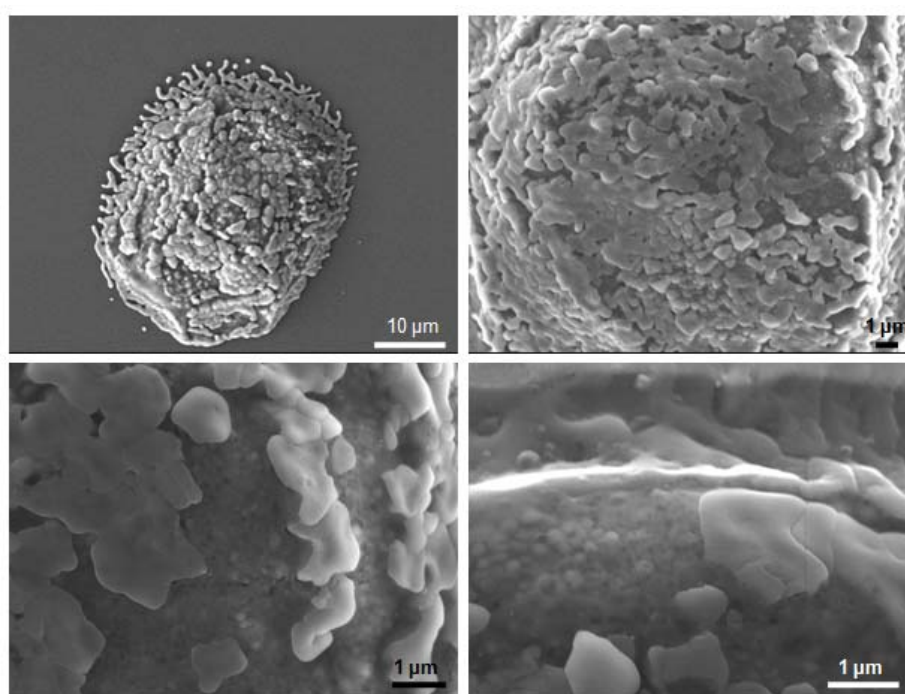

**Figure S3.** Ag-agarose beads fabricated on-chip by using hydrazine as reducing agent.

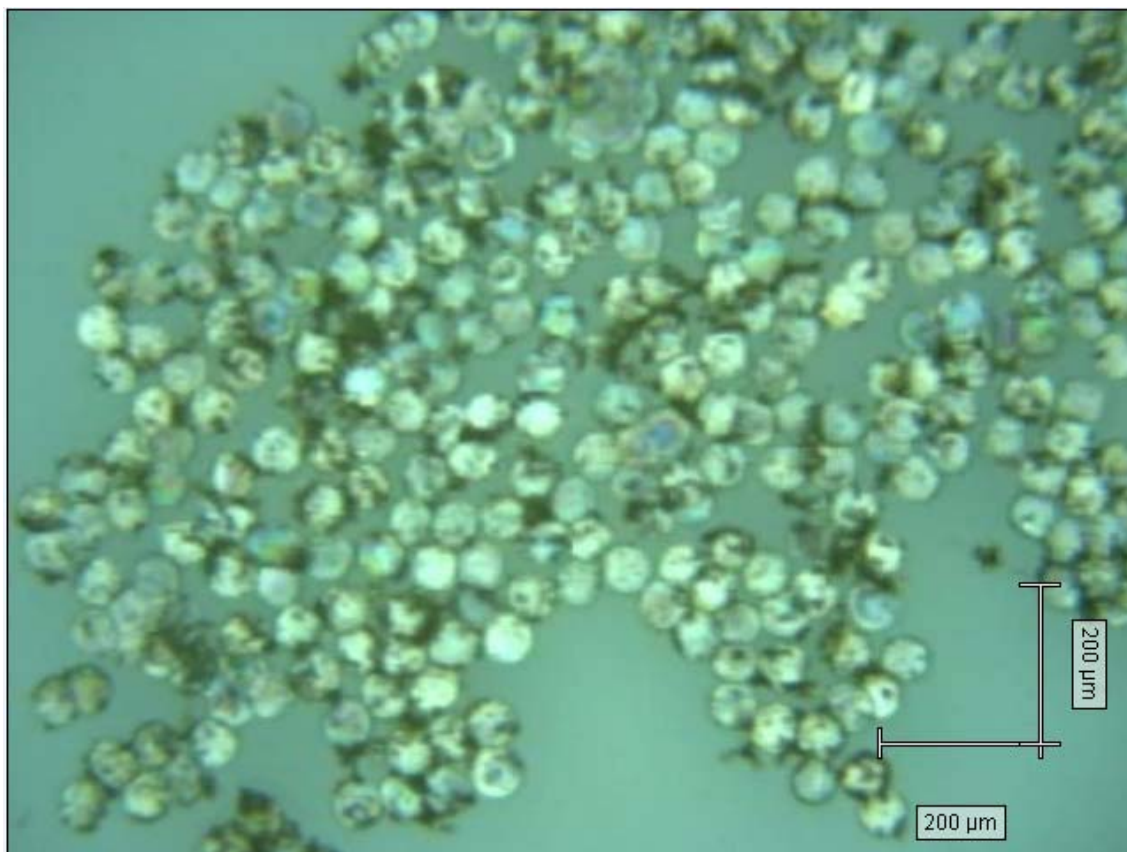

**Figure S4.** Optical micrograph showing the uniform size of the Ag-agarose beads reduced off-chip with hydrazine.

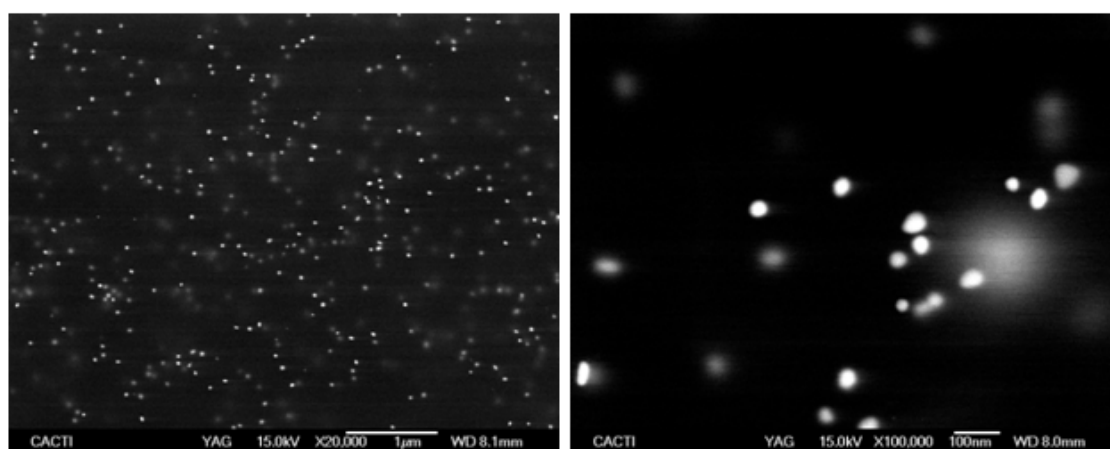

**Figure S5.** Cross-sectional SEM images of the interior of the Ag-agarose beads reduced off-chip with hydrazine.

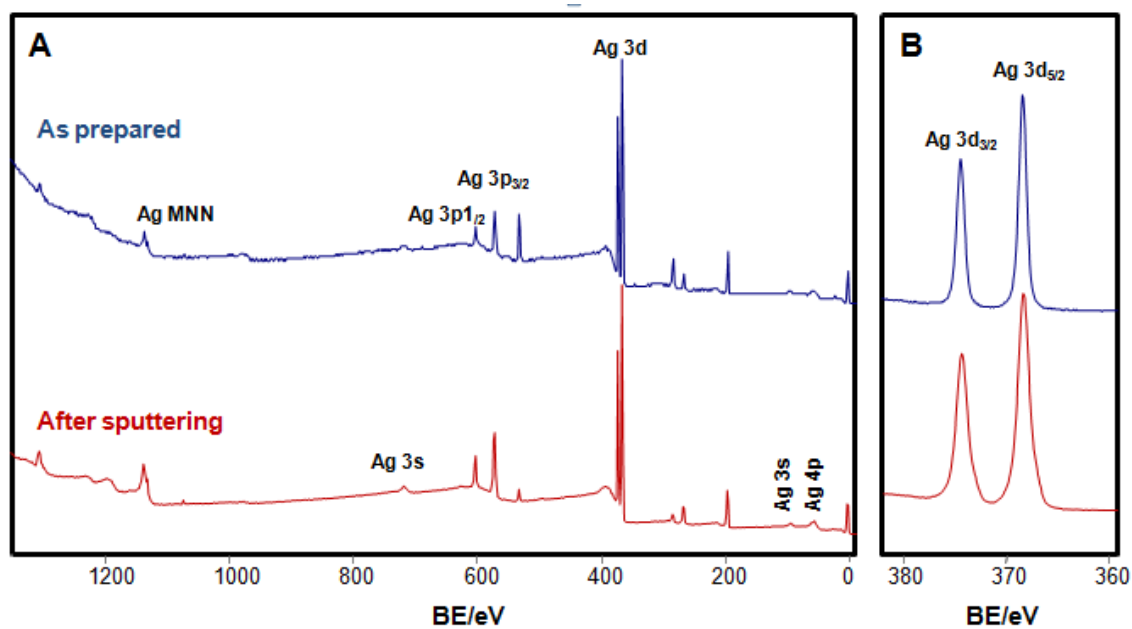

**Figure S6.** XPS spectra the Ag-agarose beads reduced off-chip with hydrazine before and after applying Ar ion plasma.
